# Supplementary figures and images for: Differentiating Epileptic and Psychogenic Non-Epileptic Seizures Using Machine Learning Analysis of EEG Plot Images
Source: MDPI journal article supplement (doi:10.3390/s24092823), 2024-04-29

**A**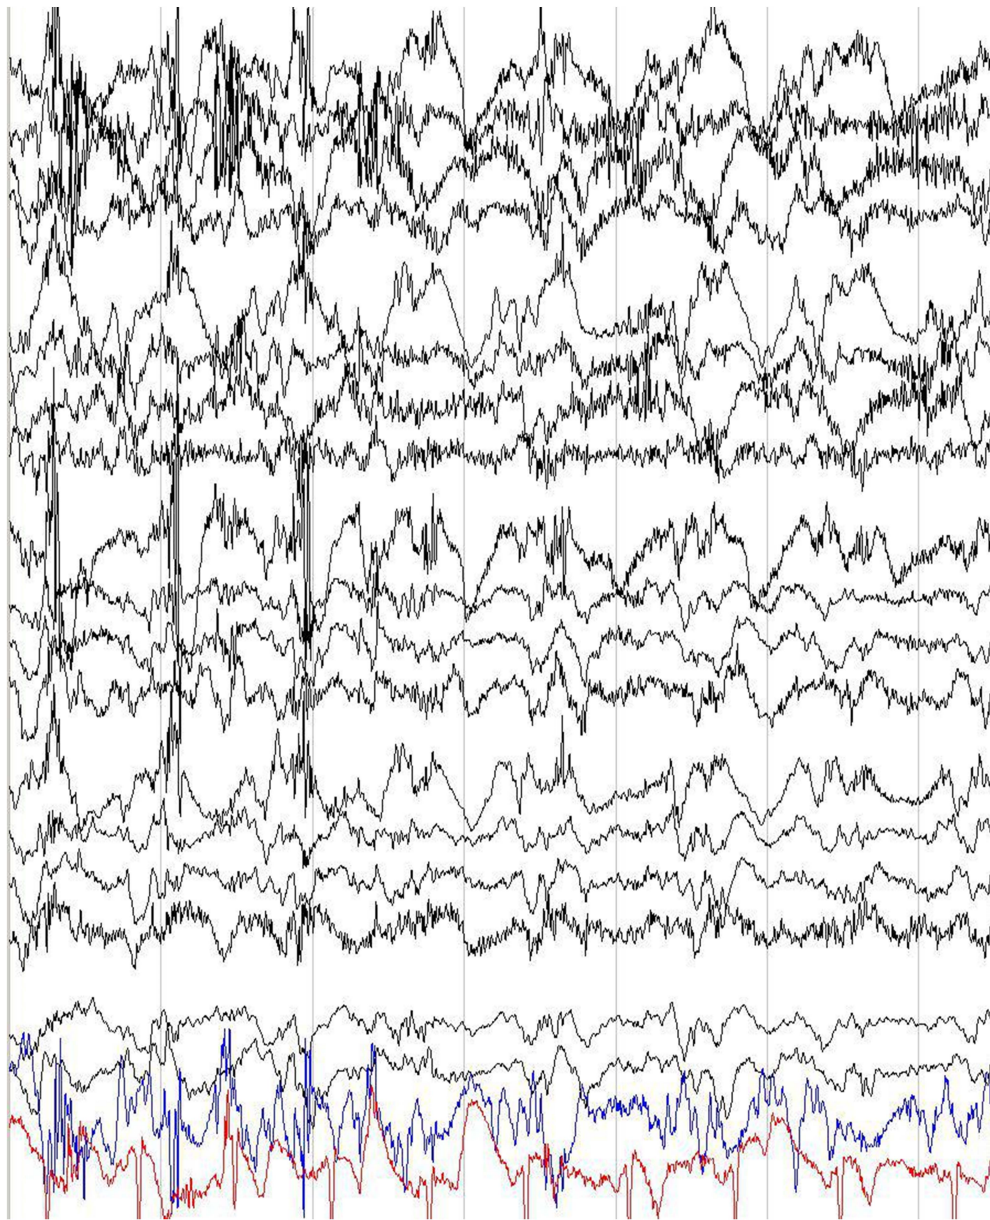**B**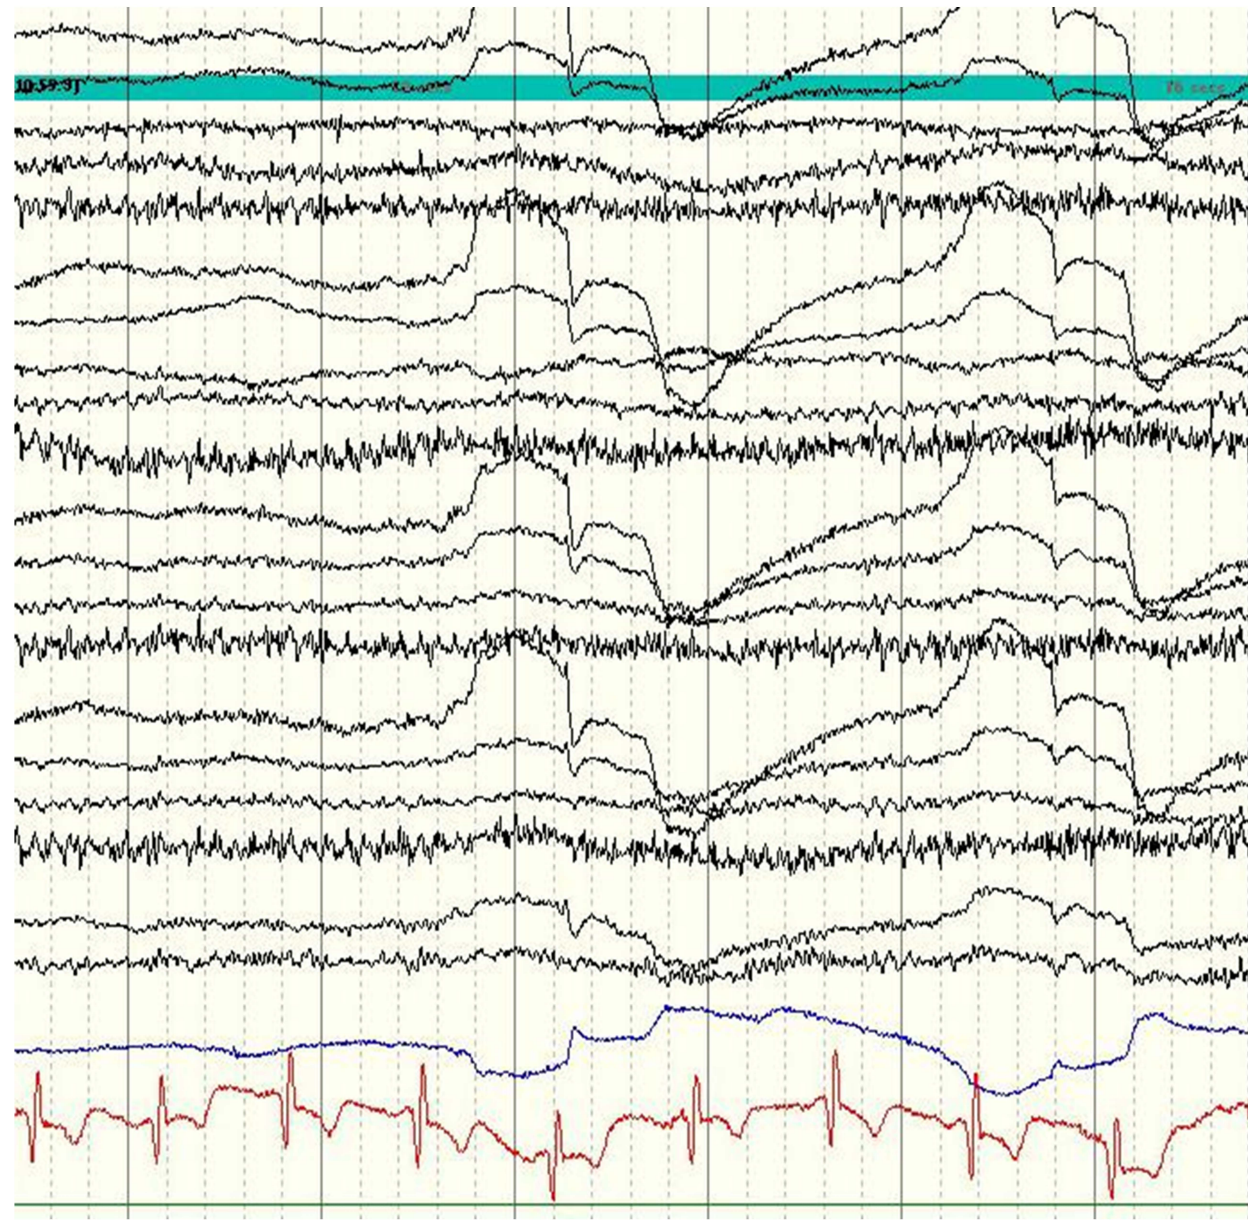

Supplement: s1 [file s1]
